# Supplementary material for: Assessment of Sport Nutrition Knowledge, Dietary Practices, and Sources of Nutrition Information in NCAA Division III Collegiate Athletes
Source: Nutrients. 2021 Aug 26;13(9):2962. doi: 10.3390/nu13092962 (PMC8470142; doi:10.3390/nu13092962)
Supplement: Supplementary file 1 [file nutrients-13-02962-s001.zip › nutrients-1327733-supplementary.pdf]

## Supplementary Materials

### Tables

**Supplementary Table S1.** Breakdown of reported sports disciplines by sex.

| Sport                         | Males ( <i>n</i> =149) <sup>†</sup> | Females ( <i>n</i> =181) <sup>††</sup> | Not indicated ( <i>n</i> =1) |
|-------------------------------|-------------------------------------|----------------------------------------|------------------------------|
| Baseball                      | 41                                  | —                                      | —                            |
| Basketball                    | 8                                   | 26                                     | —                            |
| Cheerleading                  | —                                   | 4                                      | —                            |
| Cross country/track and field | 19                                  | 40                                     | —                            |
| Field hockey                  | —                                   | 16                                     | —                            |
| Football                      | 36                                  | —                                      | 1                            |
| Golf                          | 2                                   | 1                                      | —                            |
| Gymnastics                    | —                                   | 4                                      | —                            |
| Ice Hockey                    | 18                                  | 8                                      | —                            |
| Lacrosse                      | 6                                   | 21                                     | —                            |
| Soccer                        | 7                                   | 22                                     | —                            |
| Softball                      | —                                   | 24                                     | —                            |
| Swimming and diving           | 9                                   | 16                                     | —                            |
| Tennis                        | 4                                   | —                                      | —                            |
| Volleyball                    | —                                   | 3                                      | —                            |

<sup>†</sup>*n*=1 competed in soccer and track and field

<sup>††</sup>*n*=1 competed in soccer and track and field; *n*=1 competed in soccer and softball; *n*=1 competed in field hockey and track and field; *n*=1 competed in track and field and volleyball

## Figures

A

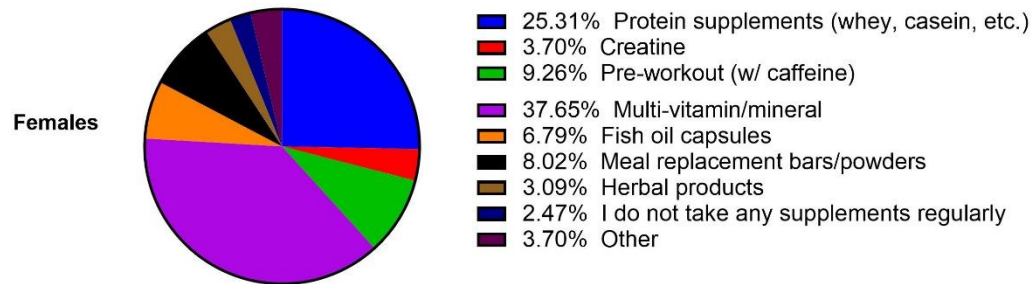

B

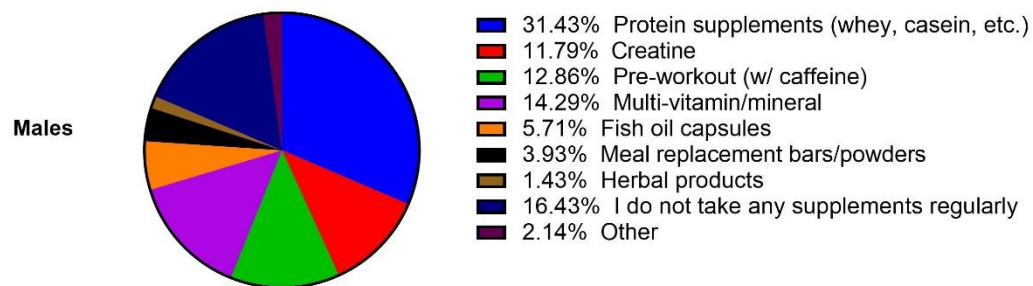

**Supplementary Figure S1.** Supplements typically consumed by athletes. Athletes were asked to select all supplements they typically consume or if they do not take supplements regularly. Data is presented as percentage of all responses cast among all options (listed in figure). A:  $n=162$  total responses; B:  $n=280$  total responses.
